# Supplementary material
Source: Springer Nature journal article supplement (https://www.springermedizin.de/resource/supplementary/13048_2011_66_MOESM1_ESM.pdf/9664862)

WT

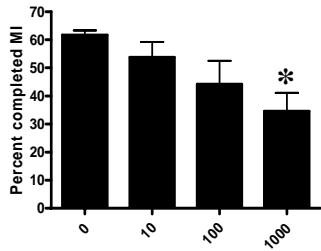

*ob/ob*

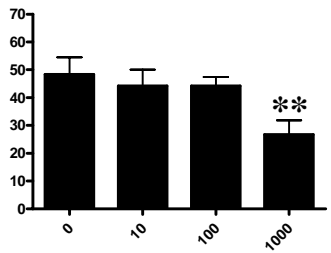

*db/db*

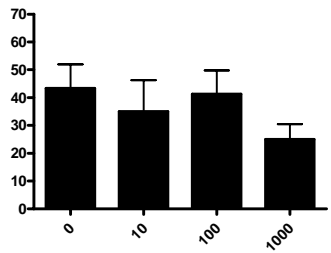

Metformin concentration, micromolar

Supplement: MOESM1 [file 9664862]
